# Supplementary material for: Impact of immunization programs on 11 childhood vaccine-preventable diseases in China: 1950–2018
Source: PubMed Central journal article supplement — Innovation (Camb). 2021 May 5;2(2):100113. doi: 10.1016/j.xinn.2021.100113 (PMC8454656; doi:10.1016/j.xinn.2021.100113), 2021-05-05
Supplement: mmc1.pdf [file mmc1.pdf]

**The Innovation, Volume 2**

**Supplemental Information**

**Impact of immunization programs on 11 childhood  
vaccine-preventable diseases in China: 1950–2018**

**Jinhua Pan, Yesheng Wang, Lingsheng Cao, Ying Wang, Qi Zhao, Shenglan Tang, Wenfeng Gong, Lei Guo, Zhixi Liu, Zexuan Wen, Bo Zheng, and Weibing Wang**

# **Impact of immunization programs on 11 childhood vaccine-preventable diseases in China:**

**1950-2018**

Jinhua Pan,<sup>1,7</sup> Yesheng Wang,<sup>1,7</sup> Lingsheng Cao,<sup>3</sup> Ying Wang,<sup>4</sup> Qi Zhao,<sup>1,2</sup> Shenglan Tang,<sup>5</sup>

Wenfeng Gong,<sup>6</sup> Lei Guo,<sup>5</sup> Zhixi Liu,<sup>1</sup> Zexuan Wen,<sup>1</sup> Bo Zheng,<sup>1</sup> Weibing Wang,<sup>1,2\*</sup>

<sup>1</sup>Fudan University, Department of Epidemiology, School of Public Health, Shanghai 200032, China;

<sup>2</sup>School of Public Health, Key Laboratory of Public Health Safety of Ministry of Education, Fudan University, Shanghai 200032, China;

<sup>3</sup>National Immunization Program, Chinese Center for Disease Control and Prevention, Beijing 102206, China;

<sup>4</sup>Fudan University, Department of Social Medicine, School of Public Health, Shanghai 200032, China;

<sup>5</sup>Duke Global Health Institute, Duke University, NC 27708, USA;

<sup>6</sup>Bill and Melinda Gates Foundation, Seattle, WA 98109, USA.

<sup>7</sup>These authors contributed equally to this work

\*Corresponding to: Weibing Wang, Department of Epidemiology, Fudan University, 138

YiXueYuan Rd., Shanghai 200032, China (e-mail: [wwb@fudan.edu.cn](mailto:wwb@fudan.edu.cn); tel: 86 21 54237811)

## **Supplemental Materials and Methods**

### **Quasi-Poisson**

We used the year during which each vaccine was introduced into the EPI as a cutoff year to define the pre-vaccination period (ten years prior to and including the cutoff year) and post-vaccination period (ten years after the cutoff year). The total number of years included in the analysis for each disease ranged from eight to twenty years, depending on the data availability and cutoff year. By assuming that any changes to the incidence rates of the examined VPDs were entirely attributable to immunization, we estimated the effectiveness of the EPI by using quasi-Poisson regression models to estimate the change in the incidence rate for each disease from the pre- to post-vaccination period. Diseases without available data prior to integration of the vaccine in the EPI (i.e., the pre-vaccination period) could not be included in these analyses.

### **Life table**

The abbreviated life table method was used to calculate the decrease of life expectancy caused by infectious diseases from 1978 to 2018, and the distribution of these reductions in different age groups in 2010 and 2016. We were unable to obtain the incidence data for each age group from 1978 to 2003, and thus used the incidence ratio of each age group in 2004 for our calculation. The incidence ratio of each age group in 2017-2018 was calculated according to the incidence ratio in 2016. The potential years of life lost (PYLL) and potential working years lost caused by premature death from infectious diseases from 2004 to 2016 were estimated. Premature death was defined as death caused by not living to the expected lifespan, and was calculated based on the natural mortality rate of the Chinese census.

## **Supplemental Results**

## **Impact of vaccination coverage on morbidity rates of VPDs**

Figure S1. shows the relationship between the vaccination coverages and incidence rates of the VPDs. Focusing on diphtheria and pertussis, we see that after the combined DTP vaccine became available free for all children across the country in 1978, the transmission of the two diseases declined significantly. Similarly, the incidence of measles rapidly declined shortly after the measles-rubella vaccine and the measles-mumps-rubella vaccine were integrated into the EPI program in 1978 and 2007, respectively, and also following the initiation of supplementary immunization activity in 2008. Conversely, even though effective vaccines against tuberculosis and hepatitis B were integrated into the EPI in the 2000s, the incidences of these diseases have continued to rise. The incidence trends of the other nine diseases were basically consistent with those of the corresponding vaccination coverages. In 1982, the Ministry of Health set EPI targets (to be reached by 1990) of 80%-90% coverage for DPT and 90%-95% coverage for OPV and measles by the time a child reached school age. Therefore, the coverage of these vaccines increased during the 1980s. By 2003, however, central government funds accounted for only 1% of total immunization expenditures and more than 50% of expenditures were being made at the village and township levels, with the result that the coverage of vaccines was on the decline. In 2004, the central government for the first time allocated funds for vaccine delivery and administration at the village and township levels. In 2004–2005, the State Council passed the Law on the Prevention and Treatment of Infectious Diseases, reaffirming the requirements for all children to be fully vaccinated. Together, these measures strengthened the financing for vaccines and vaccination services, resulting in increased and more equitable coverage and a historically low VPD burden. From 1978 to 2018, the incidence of pertussis fell 98% from 126.35 to 1.58 per million; measles fell 99% from 249.76 to 0.28 per 100,000; meningococcal meningitis fell 99% from 32.23 to 0.01 per million; and JE fell 98% from

5.39 to 0.13 per million. The last case of diphtheria was reported in 2006.

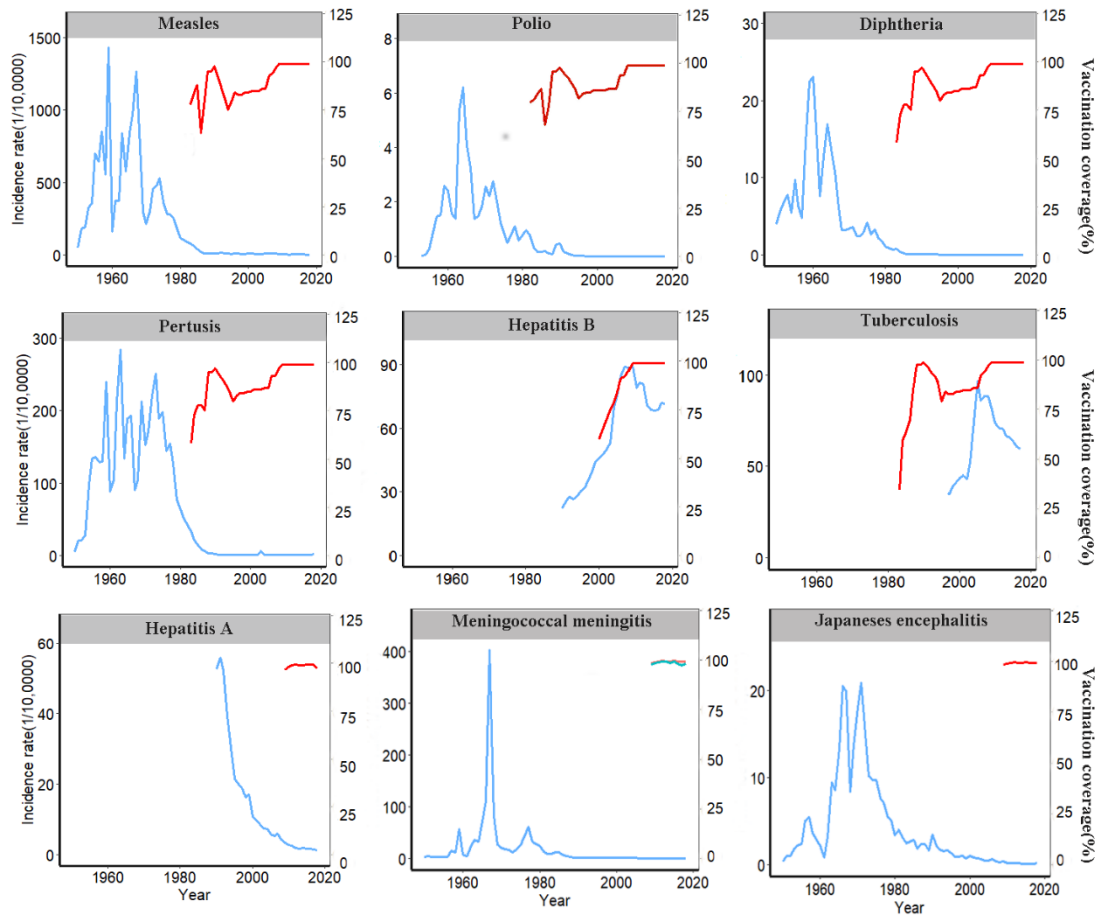

**Figure S1. Annual incidence rates of selected VPDs and vaccination coverage**

The gray background indicates the period in which the vaccination for a given disease was integrated into the national Expanded Program on Immunizations (EPI). The blue line indicates the morbidity rate of the disease; the red line represents the vaccination rate of the disease; and the green line represents the vaccination rate for the group A + C vaccine. Data on vaccination coverage of Japanese encephalitis, meningococcal meningitis and hepatitis A were collected from national vaccination coverage surveys. Data on vaccination rates for other diseases were obtained from the WHO website (<http://apps.who.int/gho/data/node.main.A824?lang=en>)

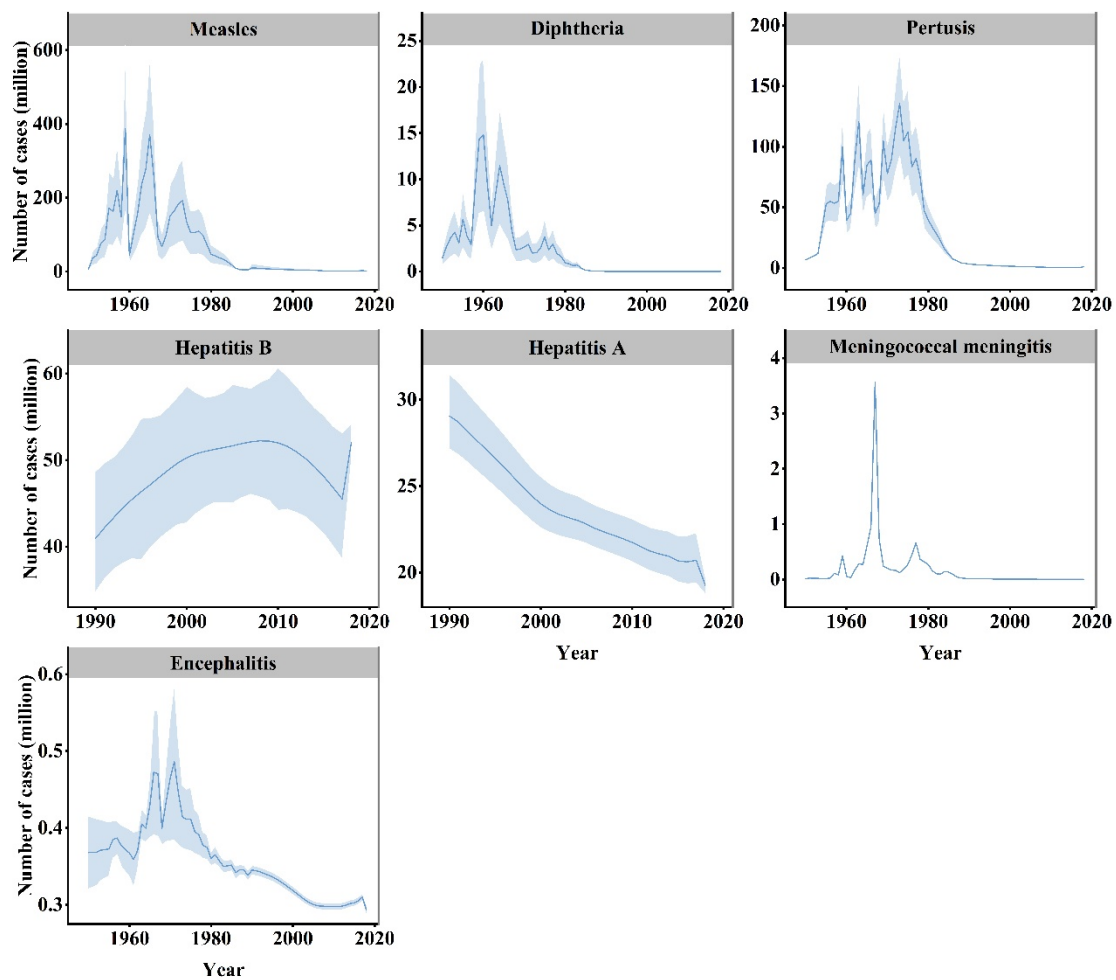

**Figure S2. Number of infectious cases adjusted for underreported and under-ascertainment.** The solid line represents the number of infectious cases and the dash area are 95% confidence interval. Cases between 1990 and 2017 were from GBD websites, cases between 1950 and 1989 and the year of 2018 were estimate from polynomial regression model

### The burden of the 11 VPDs

For hepatitis A and hepatitis B, which were not included in the EPI in 1978, the impact on life expectancy has been calculated since 1990, when these vaccines were introduced. When the hepatitis B vaccine was first introduced in 1990, the impact of hepatitis B-related death on the life expectancy of newborns was 0.023 months; in 2018, when the hepatitis B vaccination rate reached more than 95%, the impact of hepatitis B-related death on the life expectancy of newborns dropped to 0.007 months. Compared with the value in 1990, the contribution of the hepatitis B vaccine to the life expectancy of

newborns in 2018 was 0.16 months. Similarly, the 1990 introduction of the hepatitis A vaccine increased the life expectancy of newborns in 2018 by 0.015 months. By 2018, the life expectancy of neonates for meningococcal and Japanese encephalitis increased by 0.53 months and 0.23 months, respectively, relative to the 1978 levels (Table S1).

When the measles vaccine was first added to the EPI in 1978, the impact of measles death on the life expectancy of newborns was 0.40 months. In 2018, when the measles vaccine vaccination rate was above 95%, the death rate impact was 0.00002 months. The impact of several other VPDS on life expectancy in 1978-2018 is presented in the supplementary information. Overall, the impact of these 11 diseases on life expectancy decreased during the study period.

Similar results were obtained for the loss of healthy life years and loss of work years due to early deaths from these infectious diseases. Table S2 show the loss of healthy life years and loss of work years due to 11 VPDs. From 2004 to 2016, the total loss of healthy life years due to early death caused by the 11 VPDs was 1,182,322 person-years, except for an increase seen in 2012, the loss of healthy life showed a downward trend over time. In 2016, the loss of healthy life years due to early death from the infectious diseases was 53,136.77 person-years, which was significantly lower than the 81,592.79 person-years in 2004 (a decrease of 37.5%).

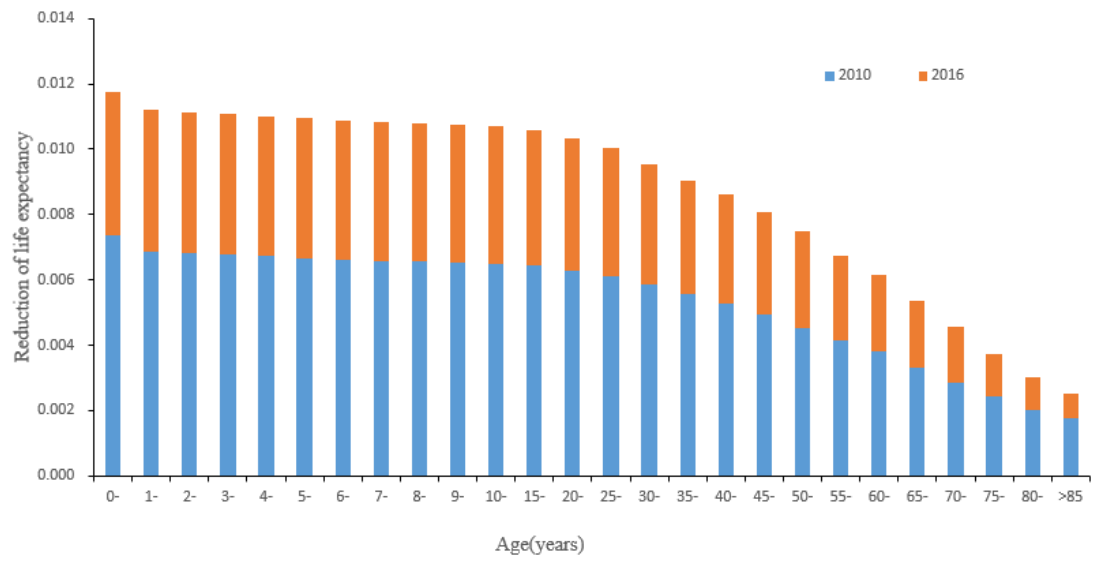

**Figure S3. The impacts of the 11 diseases on life expectancy for different age groups**



**Table S1. The effect of vaccine-preventable diseases on life expectancy in 1978-2018**

| Year | Hepatitis A |          | Meningococcal Meningitis |          | Measles  |          | Hepatitis B |          | Japanese encephalitis |          | Total of eleven diseases |          |
|------|-------------|----------|--------------------------|----------|----------|----------|-------------|----------|-----------------------|----------|--------------------------|----------|
|      | years       | months   | years                    | months   | years    | months   | years       | months   | years                 | months   | years                    | months   |
| 1978 |             |          | 0.044470                 | 0.533636 | 0.033021 | 0.396253 |             |          | 0.019287              | 0.231439 | 0.108308                 | 1.299693 |
| 1979 |             |          | 0.035311                 | 0.423727 | 0.025826 | 0.309916 |             |          | 0.016017              | 0.192205 | 0.084726                 | 1.016715 |
| 1980 |             |          | 0.029751                 | 0.357007 | 0.016344 | 0.196129 |             |          | 0.010460              | 0.125514 | 0.130526                 | 1.566311 |
| 1981 |             |          | 0.017652                 | 0.211822 | 0.013729 | 0.164743 |             |          | 0.013729              | 0.164743 | 0.050359                 | 0.604304 |
| 1982 |             |          | 0.014056                 | 0.168666 | 0.016671 | 0.200052 |             |          | 0.012748              | 0.152974 | 0.048068                 | 0.576821 |
| 1983 |             |          | 0.012748                 | 0.152974 | 0.013075 | 0.156897 |             |          | 0.007844              | 0.094133 | 0.037273                 | 0.447277 |
| 1984 |             |          | 0.018917                 | 0.227006 | 0.009260 | 0.111118 |             |          | 0.007537              | 0.090446 | 0.038133                 | 0.457600 |
| 1985 |             |          | 0.019300                 | 0.231596 | 0.008374 | 0.100487 |             |          | 0.019300              | 0.231596 | 0.036982                 | 0.443784 |
| 1986 |             |          | 0.014513                 | 0.174159 | 0.002615 | 0.031376 |             |          | 0.004935              | 0.059223 | 0.023341                 | 0.280093 |
| 1987 |             |          | 0.006962                 | 0.083542 | 0.000654 | 0.007844 |             |          | 0.007027              | 0.084327 | 0.015331                 | 0.183967 |
| 1988 |             |          | 0.005001                 | 0.060008 | 0.001601 | 0.019217 |             |          | 0.006373              | 0.076482 | 0.013313                 | 0.159753 |
| 1989 |             |          | 0.003105                 | 0.037259 | 0.001046 | 0.012550 |             |          | 0.004020              | 0.048241 | 0.008825                 | 0.105901 |
| 1990 | 0.001209    | 0.014511 | 0.002222                 | 0.026669 | 0.000556 | 0.006667 | 0.001928    | 0.023139 | 0.007714              | 0.092564 | 0.014219                 | 0.170628 |
| 1991 | 0.001079    | 0.012942 | 0.001536                 | 0.018433 | 0.001003 | 0.012040 | 0.001928    | 0.023139 | 0.003432              | 0.041181 | 0.009351                 | 0.112216 |
| 1992 | 0.000882    | 0.010589 | 0.001405                 | 0.016864 | 0.001128 | 0.013531 | 0.001732    | 0.020786 | 0.002092              | 0.025101 | 0.007439                 | 0.089269 |
| 1993 | 0.000686    | 0.008236 | 0.000915                 | 0.010981 | 0.001049 | 0.012589 | 0.001896    | 0.022747 | 0.001961              | 0.023532 | 0.006677                 | 0.080130 |
| 1994 | 0.000546    | 0.006550 | 0.001039                 | 0.012472 | 0.000690 | 0.008275 | 0.001696    | 0.020355 | 0.002186              | 0.026238 | 0.006338                 | 0.076050 |
| 1995 | 0.000428    | 0.005138 | 0.001023                 | 0.012276 | 0.000297 | 0.003569 | 0.001758    | 0.021100 | 0.001526              | 0.018315 | 0.005105                 | 0.061263 |
| 1996 | 0.000363    | 0.004353 | 0.000945                 | 0.011334 | 0.000428 | 0.005138 | 0.001700    | 0.020394 | 0.001039              | 0.012472 | 0.004523                 | 0.054281 |
| 1997 | 0.000458    | 0.005491 | 0.000788                 | 0.009452 | 0.000677 | 0.008118 | 0.001889    | 0.022669 | 0.001003              | 0.01204  | 0.007086                 | 0.085033 |
| 1998 | 0.000353    | 0.004236 | 0.000641                 | 0.007687 | 0.000346 | 0.004157 | 0.001575    | 0.018904 | 0.001330              | 0.015962 | 0.006697                 | 0.080365 |
| 1999 | 0.000291    | 0.003490 | 0.000448                 | 0.005373 | 0.000402 | 0.004824 | 0.001291    | 0.015492 | 0.000915              | 0.010981 | 0.005749                 | 0.068990 |
| 2000 | 0.000196    | 0.002353 | 0.000350                 | 0.004196 | 0.000431 | 0.005177 | 0.001530    | 0.018355 | 0.000431              | 0.005177 | 0.005766                 | 0.069186 |

---

|      |          |          |          |          |          |          |          |          |          |          |          |          |
|------|----------|----------|----------|----------|----------|----------|----------|----------|----------|----------|----------|----------|
| 2001 | 0-000190 | 0-002275 | 0-000291 | 0-003490 | 0-000412 | 0-004942 | 0-001405 | 0-016864 | 0-000634 | 0-007608 | 0-005439 | 0-065264 |
| 2002 | 0-000206 | 0-002471 | 0-000314 | 0-003765 | 0-000337 | 0-004040 | 0-001902 | 0-022826 | 0-000559 | 0-006706 | 0-005952 | 0-071422 |
| 2003 | 0-000170 | 0-002039 | 0-000337 | 0-004040 | 0-000193 | 0-002314 | 0-001863 | 0-022355 | 0-000886 | 0-010628 | 0-006324 | 0-075893 |
| 2004 | 0-000099 | 0-001186 | 0-000701 | 0-008415 | 0-000128 | 0-001533 | 0-001568 | 0-018819 | 0-000828 | 0-009932 | 0-006357 | 0-076283 |
| 2005 | 0-000093 | 0-001120 | 0-000792 | 0-009506 | 0-000220 | 0-002645 | 0-001678 | 0-020142 | 0-000942 | 0-011306 | 0-010257 | 0-123090 |
| 2006 | 0-000092 | 0-001101 | 0-000604 | 0-007253 | 0-000155 | 0-001860 | 0-001824 | 0-021885 | 0-001805 | 0-021664 | 0-010719 | 0-128623 |
| 2007 | 0-000073 | 0-000876 | 0-000502 | 0-006029 | 0-000301 | 0-003613 | 0-00152  | 0-018245 | 0-000929 | 0-011151 | 0-010082 | 0-120985 |
| 2008 | 0-000021 | 0-000251 | 0-000444 | 0-005328 | 0-000459 | 0-005505 | 0-001471 | 0-017648 | 0-000576 | 0-006911 | 0-008077 | 0-096924 |
| 2009 | 0-000043 | 0-000512 | 0-000270 | 0-003246 | 0-000170 | 0-002034 | 0-001362 | 0-016349 | 0-000645 | 0-007735 | 0-009238 | 0-110856 |
| 2010 | 0-000012 | 0-000146 | 0-000123 | 0-001474 | 0-000111 | 0-001335 | 0-001158 | 0-013900 | 0-000343 | 0-004113 | 0-007376 | 0-088513 |
| 2011 | 0-000027 | 0-000321 | 0-000199 | 0-002393 | 0-000043 | 0-000514 | 0-001042 | 0-012505 | 0-000273 | 0-003280 | 0-006255 | 0-075056 |
| 2012 | 0-000019 | 0-000224 | 0-000199 | 0-002393 | 0-000085 | 0-001020 | 0-001829 | 0-021944 | 0-000446 | 0-005355 | 0-010952 | 0-131424 |
| 2013 | 0-000003 | 0-000040 | 0-000091 | 0-001093 | 0-000126 | 0-001511 | 0-000863 | 0-010350 | 0-000201 | 0-002415 | 0-005293 | 0-063516 |
| 2014 | 0-000011 | 0-000133 | 0-000052 | 0-000623 | 0-000131 | 0-001575 | 0-000562 | 0-006748 | 0-000102 | 0-001224 | 0-00426  | 0-051121 |
| 2015 | 0-000021 | 0-00025  | 0-000060 | 0-000722 | 0-000154 | 0-001846 | 0-000542 | 0-006505 | 0-000074 | 0-000888 | 0-004274 | 0-051293 |
| 2016 | 0-000006 | 0-000075 | 0-000042 | 0-000507 | 0-000076 | 0-000912 | 0-000600 | 0-007204 | 0-000128 | 0-001533 | 0-004394 | 0-052732 |
| 2017 | 0-000006 | 0-000070 | 0-000028 | 0-000335 | 0-000007 | 0-000088 | 0-000624 | 0-007488 | 0-000116 | 0-001392 | 0-000781 | 0-009373 |
| 2018 | 0-000004 | 0-000053 | 0-000015 | 0-000176 | 0-000001 | 0-000018 | 0-000604 | 0-007249 | 0-000197 | 0-002369 | 0-000825 | 0-009899 |

---

**Table S2. Loss of healthy life and work years due to early death from the 11 vaccine-preventable diseases**

| <b>Year</b>  | <b>Loss of healthy life years (person years)</b> | <b>Total population</b> | <b>Early mortality rate</b> | <b>Loss of work years (person years)</b> |
|--------------|--------------------------------------------------|-------------------------|-----------------------------|------------------------------------------|
| 2004         | 81592.79                                         | 1299880000              | 0.00006277                  | 47410                                    |
| 2005         | 126949.6                                         | 1307560000              | 0.00009709                  | 71137.5                                  |
| 2006         | 136593.4                                         | 1314480000              | 0.00010391                  | 76960                                    |
| 2007         | 120585.1                                         | 1321290000              | 0.00009126                  | 66375                                    |
| 2008         | 97181.57                                         | 1328020000              | 0.00007318                  | 53487.5                                  |
| 2009         | 104323.7                                         | 1334500000              | 0.00007817                  | 55740                                    |
| 2010         | 81033.93                                         | 1340910000              | 0.00006043                  | 42905                                    |
| 2011         | 76899.41                                         | 1347350000              | 0.00005707                  | 41262.5                                  |
| 2012         | 133739.4                                         | 1354040000              | 0.00009877                  | 70355                                    |
| 2013         | 66203.94                                         | 1360720000              | 0.00004865                  | 35052.5                                  |
| 2014         | 52293.87                                         | 1367820000              | 0.00003823                  | 27477.5                                  |
| 2015         | 51788.21                                         | 1274620000              | 0.00004063                  | 26907.5                                  |
| 2016         | 53136.77                                         | 1382710000              | 0.00003843                  | 26955                                    |
| <b>Total</b> | <b>1182322</b>                                   | <b>17333900000</b>      | <b>0.00006821</b>           | <b>642025</b>                            |
